# Supplementary material for: CdS/CdSe co-sensitized 3D SnO2/TiO2 sea urchin-like nanotube arrays as an efficient photoanode for photoelectrochemical hydrogen generation
Source: Royal Society of Chemistry journal article supplement (doi:10.1039/c6ra02176j), 2016-01-01
Supplement: c6ra02176j1.pdf [file c6ra02176j1.pdf]

## Electronic supplementary information

### CdS/CdSe co-sensitized 3D SnO<sub>2</sub>/TiO<sub>2</sub> sea urchin-like nanotube arrays as efficient photoanode for photoelectrochemical hydrogen generation

Cheng Li, Haifeng Zhang, Chuanwei Cheng\*

Shanghai Key Laboratory of Special Artificial Microstructure Materials and Technology, School of Physics Science and Engineering, Tongji University, Shanghai 200092, P.R. China.

Email: [cwcheng@tongji.edu.cn](mailto:cwcheng@tongji.edu.cn);

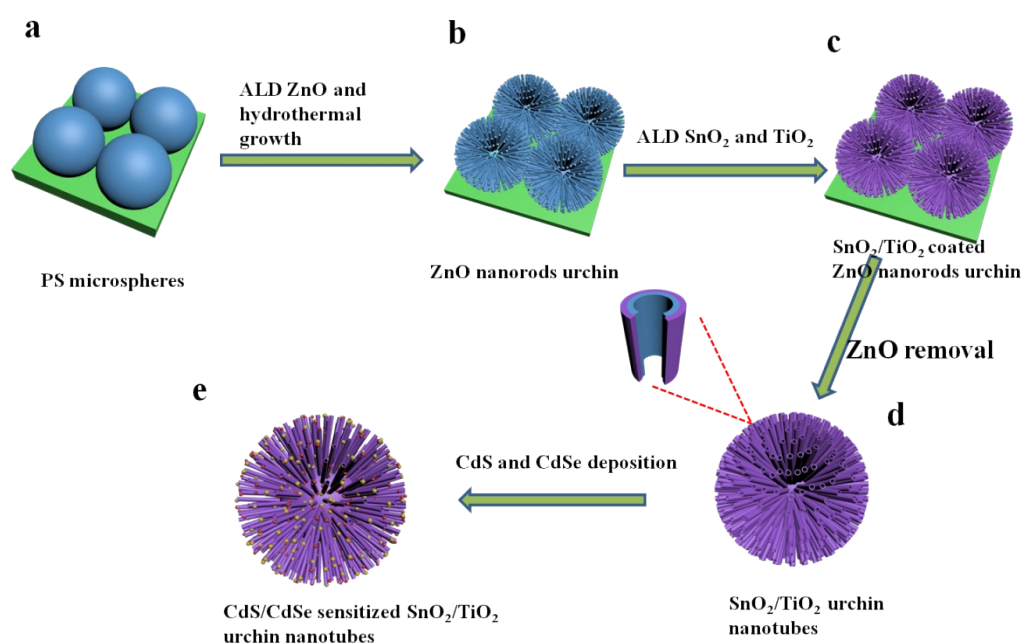

**Figure S1** Schem of the fabrication process of the CdS/CdSe quantum dots sensitized SnO<sub>2</sub>/TiO<sub>2</sub> urchin nanotubes arrays

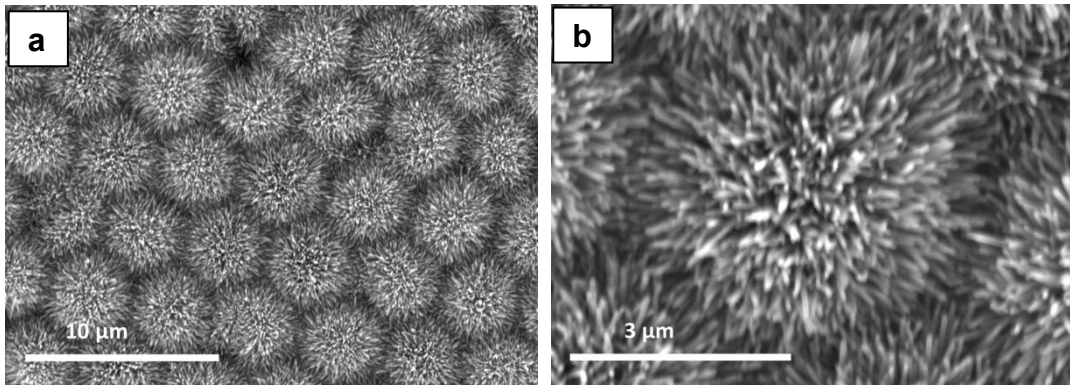

**Figure S2** SEM image of 3D SnO<sub>2</sub>/ZnO urchin-like nanorods.

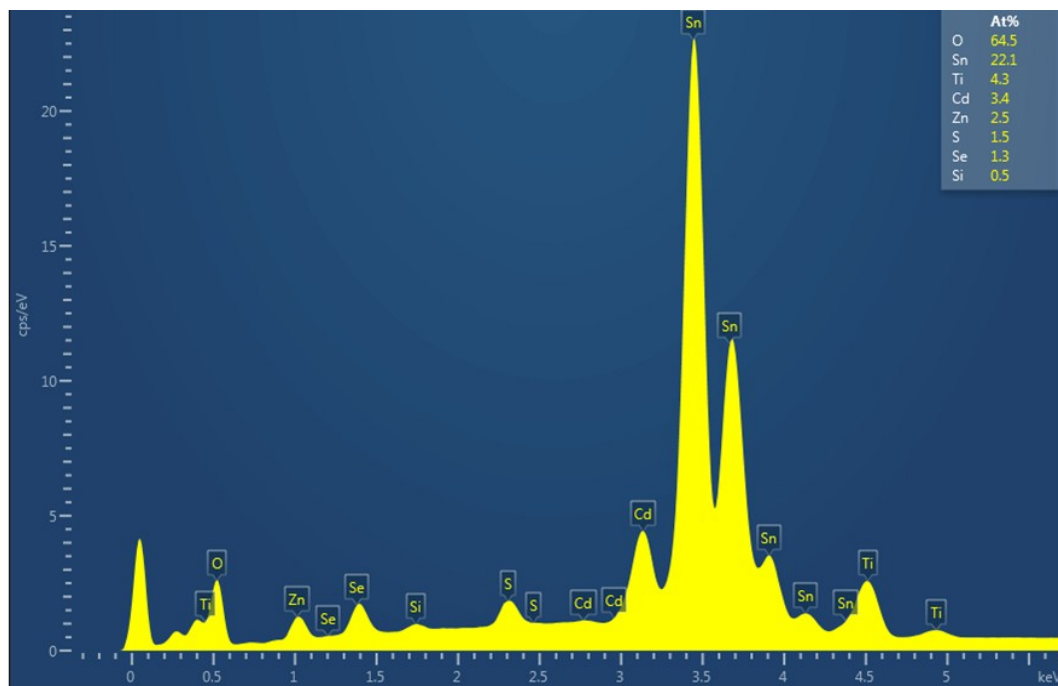

**Figure S3** EDX spectrum collected from the CdS/CdSe co-sensitized 3D SnO<sub>2</sub>/TiO<sub>2</sub> urchin-like nanotubes.
